# Supplementary material
Source: MDPI journal article supplement (https://www.mdpi.com/2077-0472/11/11/1171)
Supplement: s1 [file s1]

(a)

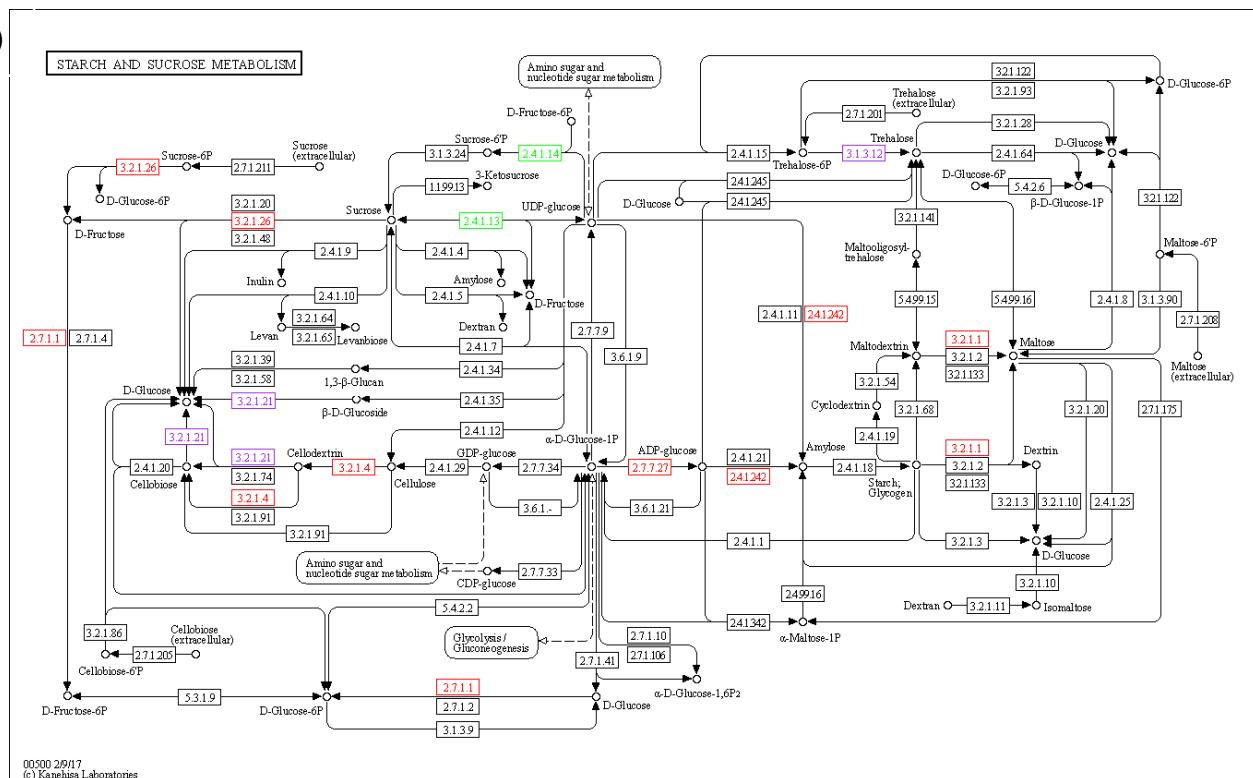

(b)

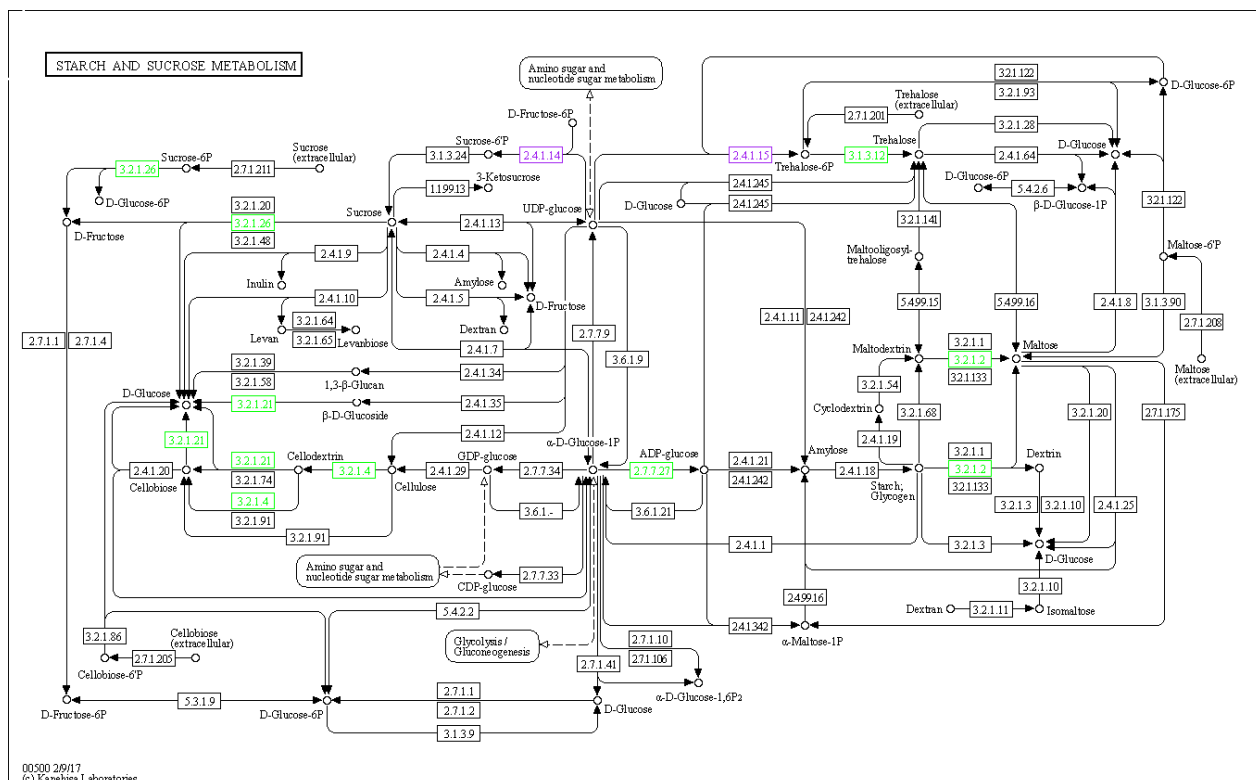

**Supplementary Figure S1.** Changes in starch and sucrose metabolism pathways in fruits of two late-ripening sweet oranges, LW (a) and XC (b) after foliar spray of EE-GRSP. Here, nodes in red and green mean that the gene is up-regulated and down-regulated by exogenous EE-GRSP, respectively; nodes in purple mean that the genes are up-regulated and down-regulated by exogenous EE-GRSP simultaneously.
